# Supplementary material for: Understanding inequalities in COVID-19 outcomes following hospital admission for people with intellectual disability compared to the general population: a matched cohort study in the UK
Source: PubMed Central journal article supplement (PMC8491000; doi:10.1136/bmjopen-2021-052482), 2021-10-03

**Appendix Table 1. Complications related to COVID-19 in hospitalised patients with and without an ID diagnosis**

|                                                     | Controls   |      | ID group   |     | p value of comparison |
|-----------------------------------------------------|------------|------|------------|-----|-----------------------|
|                                                     | n (%)      | N    | n (%)      | N   |                       |
| Viral pneumonia                                     | 595 (43.3) | 1375 | 222 (47.4) | 468 | 0.119                 |
| Bacterial pneumonia                                 | 153 (11.2) | 1364 | 63 (13.6)  | 463 | 0.182                 |
| Acute respiratory syndrome                          | 160 (11.6) | 1382 | 44 (9.3)   | 471 | 0.201                 |
| Other lung complications <sup>1</sup>               | 97 (6.9)   | 1408 | 28 (5.9)   | 476 | 0.523                 |
| Meningitis / Encephalitis                           | 6 (0.4)    | 1396 | 1 (0.2)    | 474 | 0.687                 |
| Seizures                                            | 28 (2.0)   | 1401 | 24 (5.1)   | 474 | <b>0.001</b>          |
| Other neurological complications <sup>2</sup>       | 31 (2.2)   | 1401 | 7 (1.5)    | 472 | 0.450                 |
| Cardiac arrest                                      | 31 (2.2)   | 1397 | 9 (1.9)    | 473 | 0.854                 |
| Other cardiac complications <sup>3</sup>            | 132 (9.4)  | 1409 | 34 (7.2)   | 473 | 0.160                 |
| Bacteraemia                                         | 40 (2.9)   | 1391 | 10 (2.1)   | 469 | 0.509                 |
| Gastrointestinal hemorrhage or coagulation disorder | 44 (3.1)   | 1402 | 16 (3.4)   | 473 | 0.764                 |
| Pancreatitis                                        | 10 (0.7)   | 1395 | 1 (0.2)    | 473 | 0.309                 |
| Rhabdomyolysis / Myositis                           | 5 (0.4)    | 1395 | 2 (0.4)    | 473 | 1.000                 |
| Anaemia                                             | 164 (11.7) | 1404 | 46 (9.7)   | 473 | 0.273                 |
| Acute renal injury and/or acute renal failure       | 192 (13.7) | 1402 | 57 (12.0)  | 475 | 0.389                 |
| Liver dysfunction                                   | 60 (4.3)   | 1396 | 16 (3.4)   | 472 | 0.422                 |
| Hypoglycaemia or hyperglycaemia                     | 88 (6.3)   | 1386 | 30 (6.3)   | 473 | 1.000                 |

<sup>1</sup>Combined cryptogenic organizing pneumonia (COP), pneumothorax, pleural effusion and bronchiolitis, <sup>2</sup>Combined Stroke / Cerebrovascular accident and other neurological complication, <sup>3</sup>Combined congestive heart failure, endocarditis / myocarditis pericarditis, myocarditis / pericarditis, cardiomyopathy, cardiac arrhythmia, cardiac ischemia. The number of patients in the ID group developing Covid-19 related complications while in hospital were compared to controls using Fisher's exact test.

**Appendix Figure 1. Mortality rates of hospitalised COVID-19 patients with and without an intellectual disability diagnosis**

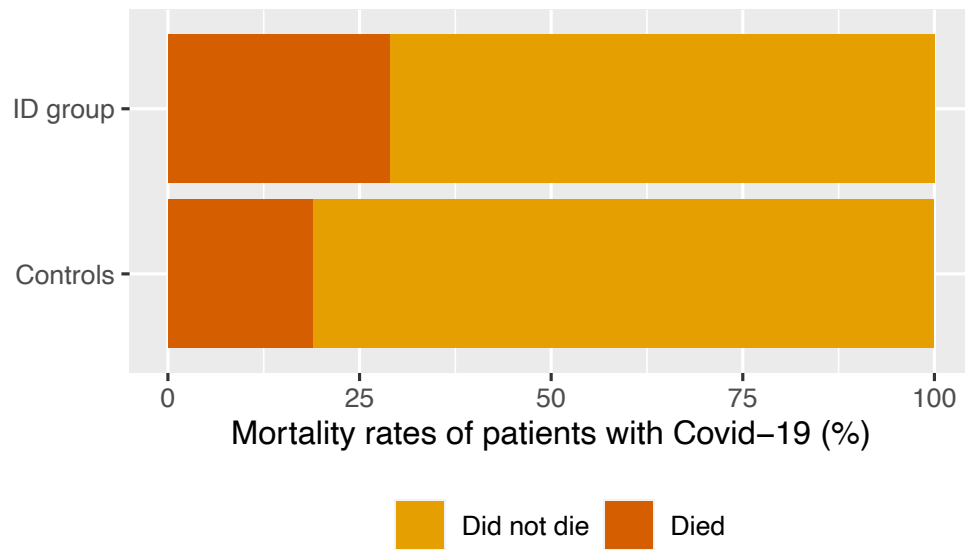

**Appendix Table 2. Factors associated with mortality in hospitalised COVID-19 patients**

|                                  | <b>Risk ratio</b> | <b>95% CI</b>  | <b>p value</b>    |
|----------------------------------|-------------------|----------------|-------------------|
| <i>Age group</i>                 |                   |                |                   |
| 20-29 years old                  | 3.39              | 0.40 - 44.51   | 0.300             |
| 30-39 years old                  | 6.95              | 1.29 - 61.92   | 0.064             |
| 40-49 years old                  | 10.17             | 2.06 - 72.36   | <b>0.023</b>      |
| 50-59 years old                  | 22.22             | 5.44 - 90.88   | <b>0.001</b>      |
| 60-69 years old                  | 25.94             | 6.57 - 93.93   | <b>0.0006</b>     |
| 70-79 years old                  | 37.26             | 10.31 - 100.09 | <b>0.0001</b>     |
| 80+ years old                    | 60.18             | 20.83 - 106.13 | <b>&lt;0.0001</b> |
| Male sex                         | 1.18              | 0.918 - 1.50   | 0.191             |
| Chronic cardiac disease          | 1.35              | 1.02 - 1.76    | <b>0.038</b>      |
| Chronic pulmonary disease        | 1.66              | 1.22 - 2.16    | <b>0.002</b>      |
| Chronic kidney disease           | 1.58              | 1.13 - 2.12    | <b>0.009</b>      |
| Liver disease                    | 1.69              | 0.97 - 2.54    | 0.055             |
| Obesity                          | 1.21              | 0.97 - 1.62    | 0.242             |
| Chronic neurological disorder    | 1.64              | 1.23 - 2.11    | <b>0.001</b>      |
| Dementia                         | 1.11              | 0.71 - 1.64    | 0.632             |
| Malignant neoplasm               | 1.32              | 0.84 - 1.92    | 0.209             |
| Shortness of breath              | 0.96              | 0.70 - 1.29    | 0.785             |
| Respiratory rate                 | 1.03              | 1.02 - 1.05    | <b>0.0003</b>     |
| No oxygen therapy                | 0.72              | 0.55 - 0.91    | <b>0.005</b>      |
| Admission to ICU                 | 0.92              | 0.51 - 1.51    | 0.758             |
| Intubation                       | 3.11              | 2.22 - 3.98    | <b>&lt;0.0001</b> |
| Non-invasive respiratory support | 1.44              | 1.02 - 1.95    | <b>0.039</b>      |
| DS diagnosis                     | 1.92              | 1.19 - 2.76    | <b>0.009</b>      |
| ID diagnosis                     | 1.56              | 1.17 - 2.02    | <b>0.003</b>      |

ICU, Intensive Care Unit; DS, Down syndrome, ID; Intellectual disability. Tracheostomy was not included in the model due to a large proportion of missing data.

**Appendix Table 3. Factors associated with mortality in hospitalised COVID-19 patients with an intellectual disability diagnosis**

|                               | Risk ratio | 95% CI      | p value       |
|-------------------------------|------------|-------------|---------------|
| <i>Age group</i>              |            |             |               |
| 20-29 years old               | 1.12       | 0.13 - 4.99 | 0.903         |
| 30-39 years old               | 2.41       | 0.61 - 6.58 | 0.213         |
| 40-49 years old               | 2.85       | 0.80 - 7.00 | 0.120         |
| 50-59 years old               | 4.28       | 1.62 - 8.04 | <b>0.012</b>  |
| 60-69 years old               | 6.43       | 3.21 - 9.07 | <b>0.0002</b> |
| 70-79 years old               | 4.04       | 1.40 - 7.93 | <b>0.022</b>  |
| 80+ years old                 | 7.33       | 3.74 - 9.44 | <b>0.0001</b> |
| Male sex                      | 1.24       | 0.84 - 1.71 | 0.267         |
| DS diagnosis                  | 1.41       | 0.86 - 2.02 | 0.152         |
| Chronic cardiac disease       | 1.50       | 0.94 - 2.12 | 0.085         |
| Chronic pulmonary disease     | 1.08       | 0.55 - 1.78 | 0.789         |
| Chronic kidney disease        | 1.50       | 0.85 - 2.22 | 0.142         |
| Liver disease                 | 1.07       | 0.33 - 2.20 | 0.894         |
| Obesity                       | 0.93       | 0.48 - 1.52 | 0.803         |
| Chronic neurological disorder | 1.39       | 0.94 - 1.90 | 0.091         |
| Dementia                      | 1.25       | 0.66 - 2.01 | 0.454         |
| Malignant neoplasm            | 0.81       | 0.28 - 1.69 | 0.633         |
| Shortness of breath           | 0.99       | 0.62 - 1.47 | 0.960         |
| Respiratory rate              | 1.02       | 1.00 - 1.05 | <b>0.036</b>  |
| No oxygen therapy             | 0.49       | 0.31 - 0.73 | <b>0.0002</b> |
| Access to any intervention    | 1.54       | 0.99 - 2.15 | 0.054         |

**Appendix Table 4. Associations between complications due to COVID-19 and mortality in patients with an ID diagnosis**

|                                                     | <b>Risk ratio</b> | <b>95% CI</b> | <b><i>p</i> value</b> |
|-----------------------------------------------------|-------------------|---------------|-----------------------|
| <i>Age group</i>                                    |                   |               |                       |
| 20-29 years old                                     | 2.39              | 0.22 - 22.71  | 0.478                 |
| 30-39 years old                                     | 4.78              | 0.79 - 27.72  | 0.141                 |
| 40-49 years old                                     | 7.00              | 1.39 - 30.29  | 0.053                 |
| 50-59 years old                                     | 7.92              | 1.77 - 30.94  | <b>0.032</b>          |
| 60-69 years old                                     | 14.97             | 4.16 -34.30   | <b>0.003</b>          |
| 70-79 years old                                     | 7.37              | 1.52 - 30.59  | <b>0.045</b>          |
| 80+ years old                                       | 18.11             | 5.11 -35.12   | <b>0.001</b>          |
| Male sex                                            | 1.11              | 0.77 - 1.54   | 0.550                 |
| Viral pneumonia                                     | 2.74              | 1.97 - 3.60   | <b>&lt;0.0001</b>     |
| Bacterial pneumonia                                 | 1.60              | 0.98 - 2.29   | 0.054                 |
| Acute respiratory syndrome                          | 2.07              | 1.28 - 2.88   | <b>0.006</b>          |
| Other lung complications <sup>1</sup>               | 1.76              | 0.93 -2.      | 0.077                 |
| Seizures                                            | 0.39              | 0.06 - 1.16   | 0.146                 |
| Other neurological complications <sup>2</sup>       | 0.87              | 0.15 - 2.50   | 0.844                 |
| Other cardiac complications <sup>3</sup>            | 0.64              | 0.24 -1.34    | 0.278                 |
| Bacteraemia                                         | 1.57              | 0.42 - 3.02   | 0.432                 |
| Gastrointestinal hemorrhage or coagulation disorder | 0.51              | 0.12 -1.48    | 0.267                 |
| Anaemia                                             | 0.51              | 0.20 - 1.08   | 0.096                 |
| Acute renal injury / Acute renal failure            | 1.17              | 0.62 - 1.92   | 0.594                 |
| Liver dysfunction                                   | 0.90              | 0.21 - 2.11   | 0.851                 |
| Hypoglycaemia or hyperglycaemia                     | 0.53              | 0.17 -1.25    | 0.183                 |

<sup>1</sup>Combined cryptogenic organizing pneumonia (COP), pneumothorax, pleural effusion and bronchiolitis, <sup>2</sup>Combined Stroke / Cerebrovascular accident and other neurological complication, <sup>3</sup>Combined congestive heart failure, endocarditis / myocarditis pericarditis, myocarditis / pericarditis, cardiomyopathy, cardiac arrhythmia, cardiac ischemia. Meningitis, pancreatitis and rhabdomyolysis were removed from the model because they were recorded in less than 1% of ID patients. Ethnicity and cardiac arrest were also removed because they were not good predictors in the model.

**Appendix Table 5. Associations between complications due to COVID-19 and mortality in patients without an ID diagnosis**

|                                                     | <b>Risk ratio</b> | <b>95% CI</b> | <b><i>p</i> value</b> |
|-----------------------------------------------------|-------------------|---------------|-----------------------|
| <i>Age group</i>                                    |                   |               |                       |
| 20-29 years old                                     | 1.07              | 0.042 - 22.07 | 0.961                 |
| 30-39 years old                                     | 2.04              | 0.30 - 29.80  | 0.522                 |
| 40-49 years old                                     | 4.12              | 0.75 - 45.82  | 0.179                 |
| 50-59 years old                                     | 10.34             | 2.34 - 69.97  | <b>0.018</b>          |
| 60-69 years old                                     | 13.12             | 3.05 - 76.02  | <b>0.008</b>          |
| 70-79 years old                                     | 26.96             | 7.05 - 91.13  | <b>0.0005</b>         |
| 80+ years old                                       | 36.49             | 10.18 - 95.93 | <b>0.0001</b>         |
| Male sex                                            | 1.02              | 0.75 - 1.35   | 0.913                 |
| Viral pneumonia                                     | 1.56              | 1.16 - 2.07   | <b>0.003</b>          |
| Bacterial pneumonia                                 | 1.01              | 0.63 - 1.52   | 0.970                 |
| Acute respiratory syndrome                          | 1.91              | 1.32 - 2.62   | <b>0.0008</b>         |
| Other lung complications <sup>1</sup>               | 1.11              | 0.64 - 1.79   | 0.683                 |
| Seizures                                            | 0.97              | 0.32 - 2.23   | 0.958                 |
| Other neurological complications <sup>2</sup>       | 0.93              | 0.33 - 2.06   | 0.881                 |
| Cardiac arrest                                      | 5.38              | 3.94 - 6.15   | <b>&lt;0.0001</b>     |
| Other cardiac complications <sup>3</sup>            | 1.82              | 1.22 - 2.57   | <b>0.004</b>          |
| Bacteraemia                                         | 0.82              | 0.32 - 1.75   | 0.646                 |
| Gastrointestinal hemorrhage or coagulation disorder | 2.78              | 1.60 - 4.09   | <b>0.0009</b>         |
| Anaemia                                             | 1.23              | 0.80 - 1.80   | 0.316                 |
| Acute renal injury / Acute renal failure            | 1.99              | 1.41 - 2.69   | <b>0.0002</b>         |
| Liver dysfunction                                   | 0.50              | 0.21 - 1.03   | 0.072                 |
| Hypoglycaemia or hyperglycaemia                     | 1.15              | 0.64 - 1.90   | 0.620                 |

<sup>1</sup>Combined cryptogenic organizing pneumonia (COP), pneumothorax, pleural effusion and bronchiolitis, <sup>2</sup>Combined Stroke / Cerebrovascular accident and other neurological complication, <sup>3</sup>Combined congestive heart failure, endocarditis / myocarditis pericarditis, myocarditis / pericarditis, cardiomyopathy, cardiac arrhythmia, cardiac ischemia. Meningitis, pancreatitis and rhabdomyolysis were removed from the model because they were recorded in less than 1% of control patients. Ethnicity was removed because it was not a good predictor in the model.

**Appendix Table 6. Kaplan-Meier estimates of survival probability of hospitalised COVID-19 patients with and without an intellectual disability diagnosis**

| Time in hospital (days) | Survival probability (% and 95% CI) |                    |
|-------------------------|-------------------------------------|--------------------|
|                         | Controls (n = 1484)                 | ID group (n = 472) |
| 0                       | 99.6 (99.3 - 99.9)                  | 98.7 (97.7 - 99.7) |
| 5                       | 93.5 (92.1 - 95.0)                  | 83.4 (79.9 - 87.0) |
| 10                      | 83.0 (80.5 - 85.6)                  | 70.9 (66.5 - 75.7) |
| 15                      | 73.6 (70.3 - 77.0)                  | 65.6 (60.7 - 70.8) |
| 20                      | 67.3 (63.5 - 71.3)                  | 60.7 (55.4 - 66.6) |

**Appendix Figure 2. Violin plot of the distribution of length of stay in COVID-19 patients with and without an intellectual disability diagnosis who were discharged alive**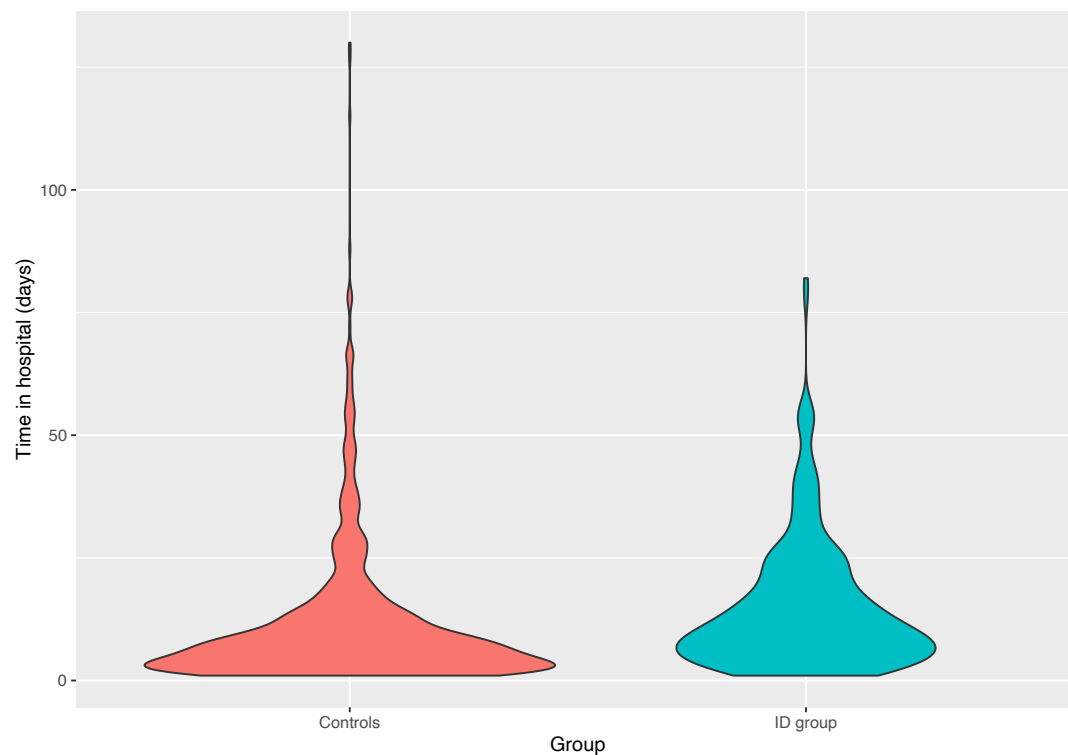

Supplement: bmjopen-2021-052482supp001.pdf [file bmjopen-2021-052482supp001.pdf]
